# Supplementary material for: Deciphering the origin of variation in the spin ground state and oxidation state of a {Mn19} cluster on a Au(111) surface: is the Au(111) surface innocent?
Source: Royal Society of Chemistry journal article supplement (doi:10.1039/c9cc03714d), 2019-01-01
Supplement: c9cc03714d1.pdf [file c9cc03714d1.pdf]

### Supplementary Information

#### COMPUTATIONAL METHODS:

All calculations have been performed using density functional methods as implemented in CP2k program package.<sup>1-4</sup> The CP2k package utilizes a hybrid basis set formalism known as Gaussian and Plane Wave Method<sup>1</sup> (GPW) where the Kohn–Sham orbitals are expanded in terms of contracted Gaussian type orbitals (GTOs), while an auxiliary plane wave basis set is used to expand the electronic charge density. A double- $\zeta$  GTH basis set and their relativistic norm-conserving pseudo potentials (Goedecker, Teter, and Hutter)<sup>3</sup> optimized for PBE were used in addition to a plane wave basis set with an energy cut-off of 400 Ry. All calculations were carried out with DZVP-MOLOPT-GTH (valence double-zeta ( $\zeta$ ) plus polarization, molecularly optimized, Goedecker-Teter-Hutter) basis set for all atoms (H, C, O, S, Cl) and DZVP-MOLOPT-SR-GTH (valence double-zeta ( $\zeta$ ) plus polarization, molecularly optimized, short-range Goedecker-Teter-Hutter) basis set for Au and Mn as implemented in the CP2k program package.<sup>1-4</sup> And the pseudo-potential used where GTH-pseud-potential (Goedecker-Teter-Hutter). For our calculations, we have employed PBE functional as implemented in CP2k package.<sup>2</sup> The unit cell are designed to obtain in both the cases, a three layered Au(111) surface applying periodic boundary conditions over an orthorhombic simulation cell. The convergence criteria of  $1 \times 10^{-6}$  Hartree for the SCF energy had been employed throughout.<sup>2</sup> The simulation cell has been employed such that x and y axes are on the surface plane as reference axes. The size along z-axis is kept more than 60 Å. An empty space is therefore left to prevent inter cells interaction and polarization effects. To account for the dispersion a DFTD2 approach has been used throughout the calculations.

Exchange part of the Hamiltonian adapted for complex 1 is given below,

$$\begin{aligned} \hat{H}_{Ex} &= -J_1[(\hat{S}_2 \hat{S}_5 + \hat{S}_3 \hat{S}_6 + \hat{S}_4 \hat{S}_7 + \hat{S}_{11} \hat{S}_{15} + \hat{S}_{12} \hat{S}_{16} + \hat{S}_{13} \hat{S}_{14})] - J_2[(\hat{S}_2 \hat{S}_6 + \hat{S}_3 \hat{S}_7 + \hat{S}_4 \hat{S}_5 + \\ &- J_3[(\hat{S}_5 \hat{S}_6 + \hat{S}_5 \hat{S}_7 + \hat{S}_6 \hat{S}_7 + \hat{S}_{14} \hat{S}_{15} + \hat{S}_{15} \hat{S}_{16} + \hat{S}_{14} \hat{S}_{16})] - J_4 \\ &[(\hat{S}_2 \hat{S}_3 + \hat{S}_2 \hat{S}_4 + \hat{S}_3 \hat{S}_4 + \hat{S}_{11} \hat{S}_{12} + \hat{S}_{11} \hat{S}_{13} + \hat{S}_{12} \hat{S}_{13})] - J_5 \\ &[(\hat{S}_1 \hat{S}_2 + \hat{S}_1 \hat{S}_3 + \hat{S}_1 \hat{S}_4 + \hat{S}_1 \hat{S}_{11} + \hat{S}_1 \hat{S}_{12} + \hat{S}_1 \hat{S}_{13})] - J_6 \\ &[(\hat{S}_5 \hat{S}_{10} + \hat{S}_6 \hat{S}_8 + \hat{S}_7 \hat{S}_9 + \hat{S}_{14} \hat{S}_{18} + \hat{S}_{15} \hat{S}_{19} + \hat{S}_{16} \hat{S}_{17})] - J_7 \\ &[(\hat{S}_2 \hat{S}_{10} + \hat{S}_3 \hat{S}_8 + \hat{S}_4 \hat{S}_9 + \hat{S}_{11} \hat{S}_{19} + \hat{S}_{12} \hat{S}_{17} + \hat{S}_{13} \hat{S}_{18})] - J_8 \\ &[(\hat{S}_5 \hat{S}_9 + \hat{S}_6 \hat{S}_{10} + \hat{S}_7 \hat{S}_8 + \hat{S}_{14} \hat{S}_{19} + \hat{S}_{15} \hat{S}_{17} + \hat{S}_{16} \hat{S}_{18})] \end{aligned}$$

**Table S1:** Comparison of the magnetic exchange coupling parameters of the {Mn19} as calculated by using PBE functional calculated by Ruiz by the PBE and functional.<sup>5</sup>

| Exchange Coupling | Ruiz etal            |           |             | This Work           |           |
|-------------------|----------------------|-----------|-------------|---------------------|-----------|
|                   | bridging ligands     | $J_{PBE}$ | $J_{B3LYP}$ | bridging ligands    | $J_{PBE}$ |
| $J_1$             | $\mu_4-O, \mu_3-N_3$ | 9.9       | 3.0         | $\mu_4-O, \mu_3-Cl$ | 9.8       |
| $J_2$             | $\mu_4-O, \mu_3-N_3$ | 15.7      | 15.2        | $\mu_4-O, \mu_3-Cl$ | 17.9      |
| $J_3$             | $\mu_4-O, \mu_3-N_3$ | 16.8      | 11.3        | $\mu_4-O, \mu_3-Cl$ | 29.7      |
| $J_4$             | $\mu_4-O, \mu_3-N_3$ | 22.2      | 14.0        | $\mu_4-O, \mu_3-Cl$ | 0.9       |
| $J_5$             | $\mu_4-O, \mu_2-OR$  | 3.6       | 1.8         | $\mu_4-O, \mu_2-O$  | 1.6       |
| $J_6$             | $\mu_4-O, \mu_2-OR$  | 7.2       | 5.4         | $\mu_4-O, \mu_2-O$  | 7.6       |
| $J_7$             | $\mu_4-O, \mu_2-OR$  | 7.2       | 3.4         | $\mu_4-O, \mu_2-O$  | 4.8       |
| $J_8$             | $\mu_4-O, \mu_2-OR$  | 5.1       | 1.6         | $\mu_4-O, \mu_2-O$  | 0.6       |

with those the Eliseo applying both B3LYP



**Spin density plots and spin densities:** Extent of spin delocalization can be understood by analyzing the computed spin density plot (see Figure 2b). All the Mn<sup>III</sup> atoms found to possess a net spin density of 3.82 to 3.90 while the Mn<sup>II</sup> atoms found to be in the range of 4.78 to 4.86. Upon adsorption on the surface, these values are nearly unaltered (See Table S6-S8) and this suggests that the magnetic core is still protected upon adsorption. Most notable changes on the ligand atoms include small variation in the sign as well magnitude of spin density when the Mn<sup>III</sup> atoms switch its geometry from octahedral in the X-ray to square-pyramidal in end-on/side-on geometries. All the spin density plots of different broken symmetry analysis as calculated by us using CP2k program package have been shown below. The pink color shows positive spin density whereas blue ones show negative spin density.

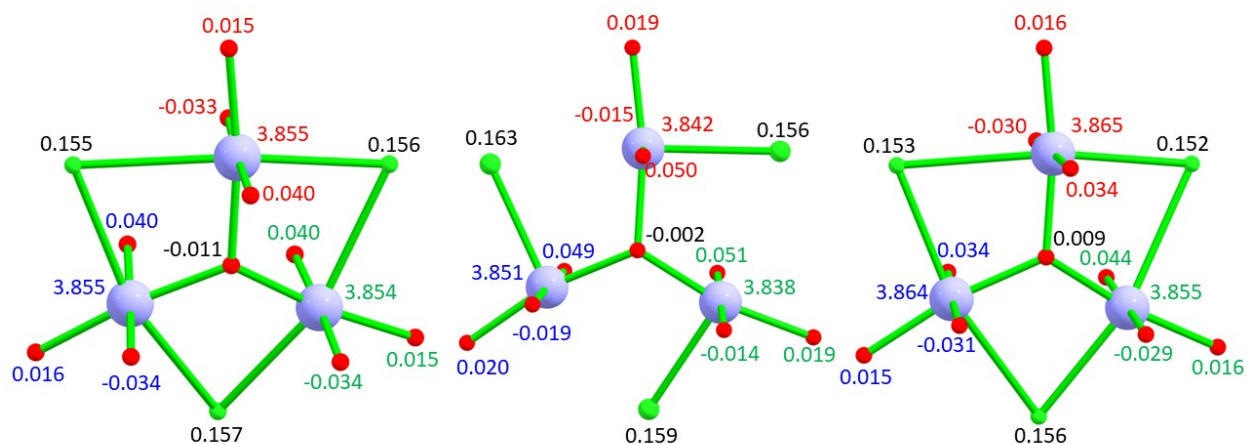

**Figure S1:** Spin density of individual atoms in a model system of three different geometries of 1.

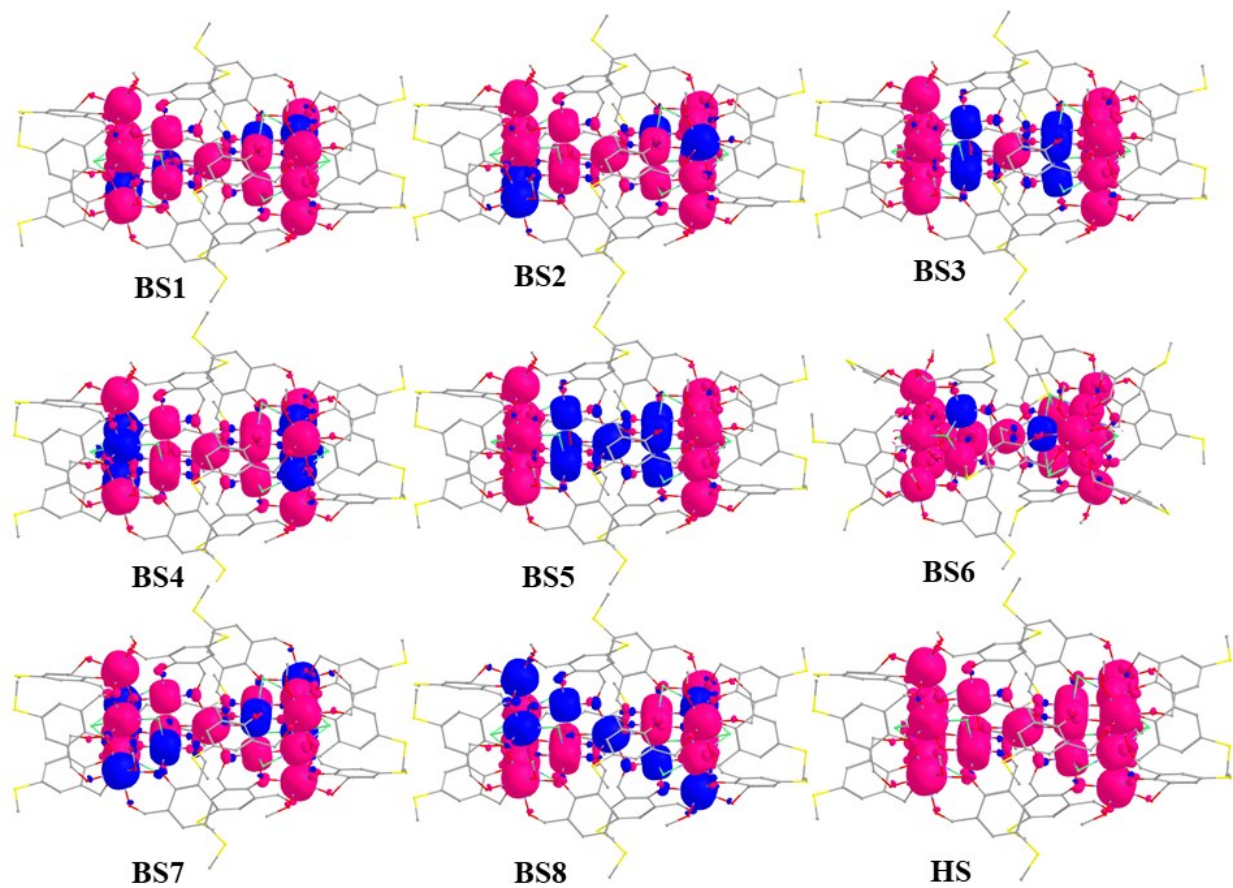

**Figure S2:** Showing spin density plots of various broken symmetry solution computed for complex 1 using X-ray structure.

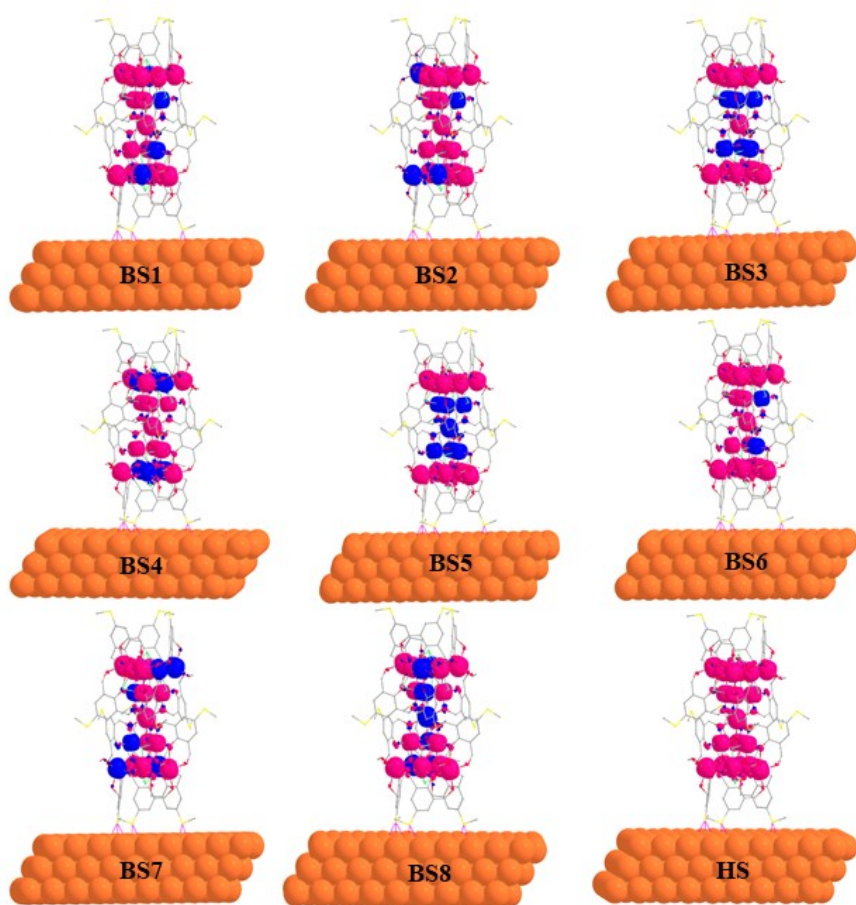

**Figure S3:** Spin density plots of high-spin and various broken symmetry solution for the optimized geometry of **1** on Au(111) surface (end-on orientation).

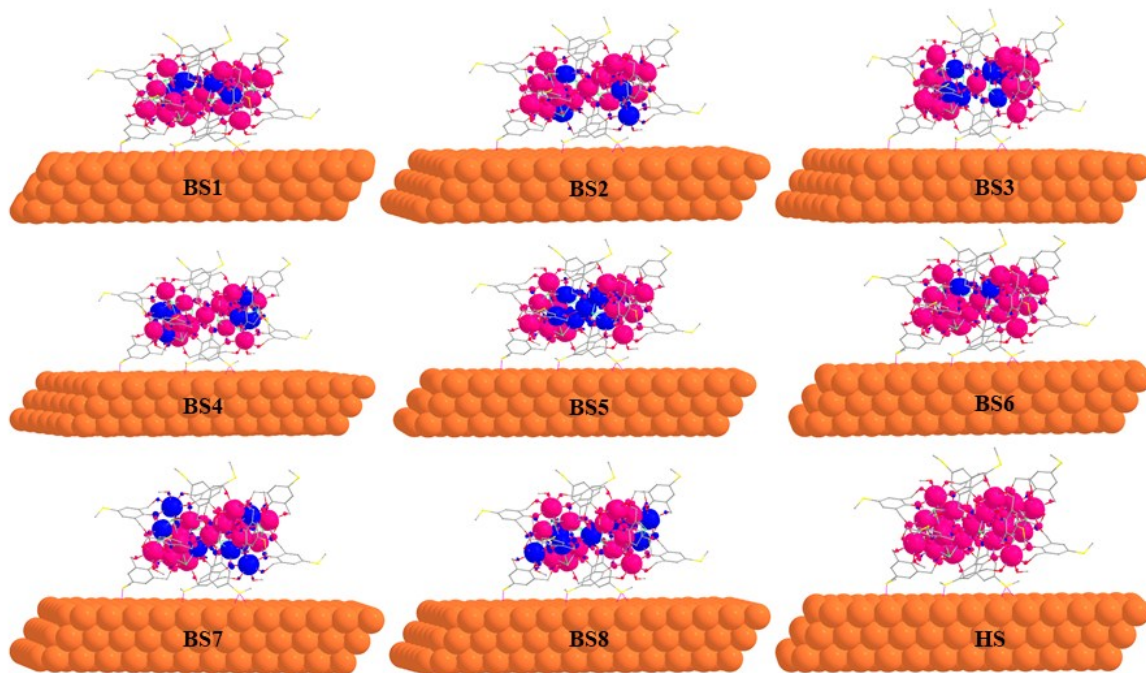

**Figure S4:** Spin density plots of high-spin and various broken symmetry solutions for optimized geometry of **1** on Au(111) surface (side-on orientation).

Table S2: Selected structural parameter along with the exchange coupling constant of the X-ray structure of complex 1. Mn atom numbers as per Figure 1b in the main manuscript.

| <i>Mn</i> | <i>bridging ligands</i>                                     | <i>M ··· M (Å)</i> | <i>Mn<sup>III</sup></i> |         | <i>Mn<sup>II</sup></i> |         |         |         |
|-----------|-------------------------------------------------------------|--------------------|-------------------------|---------|------------------------|---------|---------|---------|
|           |                                                             |                    | Mn-O/Mn                 | Mn-O/Mn | Mn-O/Mn                | Mn-O/Mn | Mn-O-Mn | Mn-O-Mn |
| 2,5       | <i>J</i> <sub>1</sub> μ <sub>4</sub> -O, μ <sub>3</sub> -Cl | 3.31612            | 1.92735                 | 2.66958 | 1.93155                | 2.66559 | 118.486 | 76.86   |
| 3,6       | <i>J</i> <sub>1</sub> μ <sub>4</sub> -O, μ <sub>3</sub> -Cl | 3.31612            | 1.9275                  | 2.66841 | 1.931                  | 2.66493 | 118.506 | 76.891  |
| 4,7       | <i>J</i> <sub>1</sub> μ <sub>4</sub> -O, μ <sub>3</sub> -Cl | 3.317              | 1.92801                 | 2.6701  | 1.93155                | 2.66559 | 118.504 | 76.875  |
| 11,15     | <i>J</i> <sub>1</sub> μ <sub>4</sub> -O, μ <sub>3</sub> -Cl | 3.31612            | 1.92683                 | 2.66914 | 1.93184                | 2.66573 | 118.497 | 76.865  |
| 12,16     | <i>J</i> <sub>1</sub> μ <sub>4</sub> -O, μ <sub>3</sub> -Cl | 3.31612            | 1.92801                 | 2.66958 | 1.9307                 | 2.66559 | 118.495 | 76.86   |
| 13,14     | <i>J</i> <sub>1</sub> μ <sub>4</sub> -O, μ <sub>3</sub> -Cl | 3.317              | 1.92801                 | 2.66937 | 1.93155                | 2.66478 | 118.504 | 76.902  |
| 2,6       | <i>J</i> <sub>2</sub> μ <sub>4</sub> -O, μ <sub>3</sub> -Cl | 3.22394            | 1.92735                 | 2.76695 | 1.91068                | 2.66493 | 114.279 | 72.787  |
| 3,7       | <i>J</i> <sub>2</sub> μ <sub>4</sub> -O, μ <sub>3</sub> -Cl | 3.22443            | 1.9275                  | 2.76782 | 1.91032                | 2.66559 | 114.316 | 72.776  |
| 4,5       | <i>J</i> <sub>2</sub> μ <sub>4</sub> -O, μ <sub>3</sub> -Cl | 3.22356            | 1.92801                 | 2.76695 | 1.90977                | 2.66559 | 114.27  | 72.768  |
| 11,14     | <i>J</i> <sub>2</sub> μ <sub>4</sub> -O, μ <sub>3</sub> -Cl | 3.22307            | 1.92683                 | 2.76695 | 1.9094                 | 2.66478 | 114.314 | 72.767  |
| 12,15     | <i>J</i> <sub>2</sub> μ <sub>4</sub> -O, μ <sub>3</sub> -Cl | 3.22443            | 1.92801                 | 2.76695 | 1.91068                | 2.66573 | 114.275 | 72.788  |
| 13,16     | <i>J</i> <sub>2</sub> μ <sub>4</sub> -O, μ <sub>3</sub> -Cl | 3.22443            | 1.92801                 | 2.76782 | 1.91068                | 2.66559 | 114.275 | 72.776  |

|       |       |                                   |         |         |         |         |         |         |         |
|-------|-------|-----------------------------------|---------|---------|---------|---------|---------|---------|---------|
| 5,6   | $J_3$ | $\mu_4\text{-O}, \mu_3\text{-Cl}$ | 3.19197 | 1.93155 | 2.65478 | 1.91068 | 2.65576 | 112.353 | 73.892  |
| 6,7   | $J_3$ | $\mu_4\text{-O}, \mu_3\text{-Cl}$ | 3.19155 | 1.931   | 2.65576 | 1.91032 | 2.65437 | 112.371 | 73.888  |
| 7,5   | $J_3$ | $\mu_4\text{-O}, \mu_3\text{-Cl}$ | 3.19115 | 1.90977 | 2.65478 | 1.93155 | 2.65437 | 112.349 | 73.893  |
| 14,15 | $J_3$ | $\mu_4\text{-O}, \mu_3\text{-Cl}$ | 3.22443 | 1.92801 | 2.76695 | 1.91068 | 2.66573 | 114.275 | 72.788  |
| 15,16 | $J_3$ | $\mu_4\text{-O}, \mu_3\text{-Cl}$ | 3.19155 | 1.91068 | 2.65485 | 1.9307  | 2.65478 | 112.368 | 73.896  |
| 16,14 | $J_3$ | $\mu_4\text{-O}, \mu_3\text{-Cl}$ | 3.19197 | 1.93155 | 2.65528 | 1.91068 | 2.65478 | 112.353 | 73.9    |
| 2,3   | $J_4$ | $\mu_4\text{-O}, \mu_3\text{-Cl}$ | 3.21233 | 1.8864  | 2.76695 | 1.8864  | 2.66841 | 116.739 | 72.431  |
| 3,4   | $J_4$ | $\mu_4\text{-O}, \mu_3\text{-Cl}$ | 3.21358 | 1.8864  | 2.76782 | 1.88714 | 2.6701  | 116.775 | 72.425  |
| 4,2   | $J_4$ | $\mu_4\text{-O}, \mu_3\text{-Cl}$ | 3.21239 | 1.8864  | 2.66958 | 1.88714 | 2.76695 | 116.705 | 72.415  |
| 11,12 | $J_4$ | $\mu_4\text{-O}, \mu_3\text{-Cl}$ | 3.21277 | 1.88653 | 2.66914 | 1.8864  | 2.76695 | 116.757 | 72.432  |
| 12,13 | $J_4$ | $\mu_4\text{-O}, \mu_3\text{-Cl}$ | 3.21277 | 1.8864  | 2.66958 | 1.887   | 2.76782 | 116.734 | 72.411  |
| 13,11 | $J_4$ | $\mu_4\text{-O}, \mu_3\text{-Cl}$ | 3.21277 | 1.88653 | 2.76695 | 1.887   | 2.66937 | 116.727 | 72.428  |
| 1,2   | $J_5$ | $\mu_4\text{-O}, \mu_2\text{-O}$  | 3.43946 | 2.55189 | 2.30911 | 1.8864  | 1.84769 | 100.529 | 111.187 |



|       |       |                                  |         |         |         |         |         |         |         |
|-------|-------|----------------------------------|---------|---------|---------|---------|---------|---------|---------|
| 1,3   | $J_5$ | $\mu_4\text{-O}, \mu_2\text{-O}$ | 3.43982 | 2.55189 | 2.30845 | 1.8864  | 1.84754 | 100.544 | 111.239 |
| 1,4   | $J_5$ | $\mu_4\text{-O}, \mu_2\text{-O}$ | 3.43946 | 2.55189 | 2.30845 | 1.88714 | 1.84762 | 100.508 | 111.218 |
| 1,11  | $J_5$ | $\mu_4\text{-O}, \mu_2\text{-O}$ | 3.44032 | 2.55189 | 2.30882 | 1.88653 | 1.84877 | 100.561 | 111.2   |
| 1,12  | $J_5$ | $\mu_4\text{-O}, \mu_2\text{-O}$ | 3.43946 | 2.55189 | 2.30874 | 1.8864  | 1.84704 | 100.529 | 111.228 |
| 1,13  | $J_5$ | $\mu_4\text{-O}, \mu_2\text{-O}$ | 3.43896 | 2.55189 | 2.30845 | 1.887   | 1.84704 | 100.491 | 111.215 |
| 5,10  | $J_6$ | $\mu_4\text{-O}, \mu_2\text{-O}$ | 3.30559 | 1.93155 | 1.90295 | 2.25516 | 2.33369 | 104.019 | 102.086 |
| 6,8   | $J_6$ | $\mu_4\text{-O}, \mu_2\text{-O}$ | 3.30558 | 1.931   | 1.90202 | 2.25584 | 2.33405 | 104.011 | 102.101 |
| 7,9   | $J_6$ | $\mu_4\text{-O}, \mu_2\text{-O}$ | 3.30601 | 1.93155 | 1.90295 | 2.25478 | 2.33478 | 104.051 | 102.065 |
| 14,18 | $J_6$ | $\mu_4\text{-O}, \mu_2\text{-O}$ | 3.30681 | 1.93155 | 1.90295 | 2.25584 | 2.33497 | 104.048 | 102.093 |
| 15,19 | $J_6$ | $\mu_4\text{-O}, \mu_2\text{-O}$ | 3.30518 | 1.93184 | 1.90202 | 2.25516 | 2.33369 | 103.99  | 102.097 |
| 16,17 | $J_6$ | $\mu_4\text{-O}, \mu_2\text{-O}$ | 3.30519 | 1.9307  | 1.90295 | 2.25478 | 2.33387 | 104.043 | 102.062 |
| 2,10  | $J_7$ | $\mu_4\text{-O}, \mu_2\text{-O}$ | 3.28353 | 1.92735 | 1.90482 | 2.25516 | 2.31654 | 103.174 | 101.682 |
| 3,8   | $J_7$ | $\mu_4\text{-O}, \mu_2\text{-O}$ | 3.28309 | 1.9275  | 1.90507 | 2.25584 | 2.31588 | 103.125 | 101.679 |
| 4,9   | $J_7$ | $\mu_4\text{-O}, \mu_2\text{-O}$ | 3.28264 | 1.92801 | 1.90418 | 2.25478 | 2.31527 | 103.126 | 101.709 |

|       |       |                                  |         |         |         |         |         |         |         |
|-------|-------|----------------------------------|---------|---------|---------|---------|---------|---------|---------|
| 11,19 | $J_7$ | $\mu_4\text{-O}, \mu_2\text{-O}$ | 3.28264 | 1.92683 | 1.90482 | 2.25516 | 2.31588 | 103.151 | 101.667 |
| 12,17 | $J_7$ | $\mu_4\text{-O}, \mu_2\text{-O}$ | 3.28264 | 1.92801 | 1.90482 | 2.25478 | 2.31588 | 103.126 | 101.667 |
| 13,18 | $J_7$ | $\mu_4\text{-O}, \mu_2\text{-O}$ | 3.28398 | 1.92801 | 1.90443 | 2.25584 | 2.31593 | 103.147 | 101.735 |
| 6,10  | $J_8$ | $\mu_4\text{-O}, \mu_2\text{-O}$ | 3.24308 | 1.91068 | 1.8716  | 2.25516 | 2.21698 | 101.928 | 104.656 |
| 5,9   | $J_8$ | $\mu_4\text{-O}, \mu_2\text{-O}$ | 3.2423  | 1.90977 | 1.8716  | 2.25478 | 2.21585 | 101.937 | 104.663 |
| 7,8   | $J_8$ | $\mu_4\text{-O}, \mu_2\text{-O}$ | 3.2423  | 1.91032 | 1.8716  | 2.25584 | 2.21585 | 101.881 | 104.663 |
| 14,19 | $J_8$ | $\mu_4\text{-O}, \mu_2\text{-O}$ | 3.24187 | 1.9094  | 1.8716  | 2.25516 | 2.21564 | 101.916 | 104.652 |
| 15,17 | $J_8$ | $\mu_4\text{-O}, \mu_2\text{-O}$ | 3.2427  | 1.91068 | 1.8716  | 2.25478 | 2.21669 | 101.925 | 104.65  |
| 16,18 | $J_8$ | $\mu_4\text{-O}, \mu_2\text{-O}$ | 3.24311 | 1.91068 | 1.8716  | 2.25584 | 2.21635 | 101.905 | 104.682 |

**Table S3:** Selected structural parameter along with the exchange coupling constant of the end-on geometry of **1** on Au(111) surface. Mn atom numbers as per Figure 1b in the main manuscript.

| <i>M</i> | <i>bridging ligands</i>                                     | <i>M · · · M (Å)</i> | <i>Mn<sup>III</sup></i> | <i>Mn<sup>III</sup></i> | <i>Mn<sup>II</sup></i> | <i>Mn<sup>II</sup></i> | <i>Mn-O-Mn</i> | <i>Mn-O-Mn</i> |
|----------|-------------------------------------------------------------|----------------------|-------------------------|-------------------------|------------------------|------------------------|----------------|----------------|
|          |                                                             |                      | Mn-O/Mn                 | Mn-O/Mn                 | Mn-O/Mn                | Mn-O/Mn                | Mn-O-Mn        | Mn-O-Mn        |
| 2,5      | <i>J</i> <sub>1</sub> μ <sub>4</sub> -O, μ <sub>3</sub> -Cl | 3.14733              | 1.91491                 | 2.55721                 | 1.90573                | 2.54954                | 110.928        | 76.094         |
| 3,6      | <i>J</i> <sub>1</sub> μ <sub>4</sub> -O, μ <sub>3</sub> -Cl | 3.179                | 1.89837                 | 2.62236                 | 1.90513                | 2.53422                | 113.4          | 76.1           |
| 4,7      | <i>J</i> <sub>1</sub> μ <sub>4</sub> -O, μ <sub>3</sub> -Cl | 3.15031              | 1.91217                 | 2.54549                 | 1.9047                 | 2.55178                | 111.25         | 76.346         |
| 11,15    | <i>J</i> <sub>1</sub> μ <sub>4</sub> -O, μ <sub>3</sub> -Cl | 3.17562              | 1.92067                 | 2.58116                 | 1.90381                | 2.52947                | 112.266        | 76.826         |
| 12,16    | <i>J</i> <sub>1</sub> μ <sub>4</sub> -O, μ <sub>3</sub> -Cl | 3.1121               | 1.90284                 | 2.53549                 | 1.88562                | 2.54393                | 110.464        | 75.568         |
| 13,14    | <i>J</i> <sub>1</sub> μ <sub>4</sub> -O, μ <sub>3</sub> -Cl | 3.15966              | 1.90689                 | 2.52404                 | 1.89592                | 2.62137                | 112.377        | 75.743         |
| 2,6      | <i>J</i> <sub>2</sub> μ <sub>4</sub> -O, μ <sub>3</sub> -Cl | 3.2568               | 1.91491                 | 3.02461                 | 1.9072                 | 2.53422                | 116.88         | 71.107         |
| 3,7      | <i>J</i> <sub>2</sub> μ <sub>4</sub> -O, μ <sub>3</sub> -Cl | 3.21128              | 1.89837                 | 2.91692                 | 1.89553                | 2.55178                | 115.652        | 71.565         |
| 4,5      | <i>J</i> <sub>2</sub> μ <sub>4</sub> -O, μ <sub>3</sub> -Cl | 3.26129              | 1.91217                 | 2.94276                 | 1.90733                | 2.54954                | 117.267        | 72.453         |
| 11,14    | <i>J</i> <sub>2</sub> μ <sub>4</sub> -O, μ <sub>3</sub> -Cl | 3.26462              | 1.92067                 | 2.91279                 | 1.89747                | 2.62137                | 117.525        | 72.082         |
| 12,15    | <i>J</i> <sub>2</sub> μ <sub>4</sub> -O, μ <sub>3</sub> -Cl | 3.26232              | 1.90284                 | 3.02375                 | 1.88724                | 2.52947                | 118.802        | 71.323         |
| 13,16    | <i>J</i> <sub>2</sub> μ <sub>4</sub> -O, μ <sub>3</sub> -Cl | 3.27424              | 1.90689                 | 3.06507                 | 1.89436                | 2.54393                | 118.939        | 70.734         |

|       |       |                                   |         |         |         |         |         |         |         |
|-------|-------|-----------------------------------|---------|---------|---------|---------|---------|---------|---------|
| 5,6   | $J_3$ | $\mu_4\text{-O}, \mu_3\text{-Cl}$ | 3.20913 | 1.90573 | 2.64992 | 1.9072  | 2.64769 | 114.628 | 74.568  |
| 6,7   | $J_3$ | $\mu_4\text{-O}, \mu_3\text{-Cl}$ | 3.24417 | 1.90513 | 2.64769 | 1.89553 | 2.65306 | 117.207 | 75.472  |
| 7,5   | $J_3$ | $\mu_4\text{-O}, \mu_3\text{-Cl}$ | 3.21344 | 1.90733 | 2.64992 | 1.9047  | 2.65306 | 114.911 | 74.597  |
| 14,15 | $J_3$ | $\mu_4\text{-O}, \mu_3\text{-Cl}$ | 3.19521 | 1.89747 | 2.59893 | 1.90381 | 2.67941 | 114.399 | 74.49   |
| 15,16 | $J_3$ | $\mu_4\text{-O}, \mu_3\text{-Cl}$ | 3.1861  | 1.88724 | 2.67941 | 1.88562 | 2.63908 | 115.232 | 73.601  |
| 16,14 | $J_3$ | $\mu_4\text{-O}, \mu_3\text{-Cl}$ | 3.16562 | 1.89592 | 2.59893 | 1.89436 | 2.63908 | 113.272 | 74.361  |
| 2,3   | $J_4$ | $\mu_4\text{-O}, \mu_3\text{-Cl}$ | 3.22894 | 1.89354 | 3.02461 | 1.88215 | 2.62236 | 117.562 | 69.332  |
| 3,4   | $J_4$ | $\mu_4\text{-O}, \mu_3\text{-Cl}$ | 3.17814 | 1.89409 | 2.54549 | 1.88215 | 2.91692 | 114.622 | 70.785  |
| 4,2   | $J_4$ | $\mu_4\text{-O}, \mu_3\text{-Cl}$ | 3.24782 | 1.89354 | 2.55721 | 1.89409 | 2.94276 | 118.07  | 72      |
| 11,12 | $J_4$ | $\mu_4\text{-O}, \mu_3\text{-Cl}$ | 3.23989 | 1.89852 | 2.58116 | 1.89365 | 3.02375 | 117.379 | 70.118  |
| 12,13 | $J_4$ | $\mu_4\text{-O}, \mu_3\text{-Cl}$ | 3.24339 | 1.89365 | 2.53549 | 1.89473 | 3.06507 | 117.772 | 70.048  |
| 13,11 | $J_4$ | $\mu_4\text{-O}, \mu_3\text{-Cl}$ | 3.1809  | 1.89852 | 2.91279 | 1.89473 | 2.52404 | 113.979 | 71.207  |
| 1,2   | $J_5$ | $\mu_4\text{-O}, \mu_2\text{-O}$  | 3.30136 | 2.3738  | 2.22363 | 1.89354 | 1.8312  | 100.761 | 108.627 |
| 1,3   | $J_5$ | $\mu_4\text{-O}, \mu_2\text{-O}$  | 3.28871 | 2.3738  | 2.26192 | 1.88215 | 2.26192 | 100.564 | 107.065 |

|       |       |                                  |         |         |         |         |         |         |         |
|-------|-------|----------------------------------|---------|---------|---------|---------|---------|---------|---------|
| 1,4   | $J_5$ | $\mu_4\text{-O}, \mu_2\text{-O}$ | 3.28809 | 2.3738  | 2.2089  | 1.89409 | 1.83316 | 100.178 | 108.516 |
| 1,11  | $J_5$ | $\mu_4\text{-O}, \mu_2\text{-O}$ | 3.29991 | 2.33636 | 2.25389 | 1.89852 | 1.82476 | 101.881 | 107.545 |
| 1,12  | $J_5$ | $\mu_4\text{-O}, \mu_2\text{-O}$ | 3.27984 | 2.33636 | 2.24715 | 1.89365 | 1.82528 | 101.162 | 106.837 |
| 1,13  | $J_5$ | $\mu_4\text{-O}, \mu_2\text{-O}$ | 3.26021 | 2.33636 | 2.22543 | 1.89473 | 1.82284 | 100.283 | 106.865 |
| 5,10  | $J_6$ | $\mu_4\text{-O}, \mu_2\text{-O}$ | 3.24212 | 1.90573 | 1.91517 | 2.23853 | 2.23451 | 102.65  | 102.486 |
| 6,8   | $J_6$ | $\mu_4\text{-O}, \mu_2\text{-O}$ | 3.27361 | 1.90513 | 1.9031  | 2.21956 | 2.32987 | 104.802 | 100.832 |
| 7,9   | $J_6$ | $\mu_4\text{-O}, \mu_2\text{-O}$ | 3.24423 | 1.9047  | 1.91089 | 2.22117 | 2.2631  | 103.419 | 101.687 |
| 14,18 | $J_6$ | $\mu_4\text{-O}, \mu_2\text{-O}$ | 3.24492 | 1.89592 | 1.91212 | 2.25055 | 2.20385 | 102.658 | 103.842 |
| 15,19 | $J_6$ | $\mu_4\text{-O}, \mu_2\text{-O}$ | 3.21485 | 1.90381 | 1.9076  | 2.21637 | 2.21098 | 102.304 | 102.376 |
| 16,17 | $J_6$ | $\mu_4\text{-O}, \mu_2\text{-O}$ | 3.249   | 1.88562 | 1.92793 | 2.26616 | 2.20319 | 102.605 | 103.513 |
| 2,10  | $J_7$ | $\mu_4\text{-O}, \mu_2\text{-O}$ | 3.44285 | 2.23853 | 2.66175 | 1.91491 | 1.8806  | 111.739 | 97.067  |
| 3,8   | $J_7$ | $\mu_4\text{-O}, \mu_2\text{-O}$ | 3.20041 | 1.89837 | 1.88514 | 2.21956 | 2.20867 | 101.724 | 102.559 |
| 4,9   | $J_7$ | $\mu_4\text{-O}, \mu_2\text{-O}$ | 3.36798 | 1.91217 | 1.88137 | 2.22117 | 2.56822 | 108.913 | 97.181  |
| 11,19 | $J_7$ | $\mu_4\text{-O}, \mu_2\text{-O}$ | 3.36572 | 1.92067 | 1.92067 | 2.21637 | 2.54124 | 108.68  | 97.86   |

|       |       |                                  |         |         |         |         |         |         |         |
|-------|-------|----------------------------------|---------|---------|---------|---------|---------|---------|---------|
| 12,17 | $J_7$ | $\mu_4\text{-O}, \mu_2\text{-O}$ | 3.3732  | 1.90284 | 1.89129 | 2.26616 | 2.48978 | 107.701 | 99.797  |
| 13,18 | $J_7$ | $\mu_4\text{-O}, \mu_2\text{-O}$ | 3.37196 | 1.90689 | 1.89645 | 2.25055 | 2.5165  | 108.117 | 98.682  |
| 6,10  | $J_8$ | $\mu_4\text{-O}, \mu_2\text{-O}$ | 3.14443 | 1.9072  | 1.89237 | 2.23853 | 2.06997 | 98.343  | 104.954 |
| 5,9   | $J_8$ | $\mu_4\text{-O}, \mu_2\text{-O}$ | 3.15035 | 1.90733 | 1.89514 | 2.22117 | 2.0542  | 99.19   | 105.75  |
| 7,8   | $J_8$ | $\mu_4\text{-O}, \mu_2\text{-O}$ | 3.18418 | 1.89553 | 1.8896  | 2.21956 | 2.12831 | 101.097 | 104.683 |
| 14,19 | $J_8$ | $\mu_4\text{-O}, \mu_2\text{-O}$ | 3.14494 | 1.89747 | 1.8807  | 2.21637 | 2.1013  | 99.429  | 104.195 |
| 15,17 | $J_8$ | $\mu_4\text{-O}, \mu_2\text{-O}$ | 3.18574 | 1.88724 | 1.88287 | 2.26616 | 2.0855  | 99.772  | 106.682 |
| 16,18 | $J_8$ | $\mu_4\text{-O}, \mu_2\text{-O}$ | 3.16116 | 1.89436 | 1.88312 | 2.25055 | 2.06634 | 99.038  | 106.245 |

**Table S4:** Selected structural parameter along with the exchange coupling constant of the side-on geometry of **1** on Au(111) surface. Mn atom numbers as per Figure 1b in the main manuscript.

| <i>Mn</i> | <i>bridging ligands</i> | <i>M ··· M (Å)</i>                | <i>Mn<sup>III</sup></i> | <i>Mn<sup>III</sup></i> | <i>Mn<sup>II</sup></i> | <i>Mn<sup>II</sup></i> | <i>Mn-O-Mn</i> | <i>Mn-O-Mn</i> |        |
|-----------|-------------------------|-----------------------------------|-------------------------|-------------------------|------------------------|------------------------|----------------|----------------|--------|
|           |                         |                                   | Mn-O/Mn                 | Mn-O/Mn                 | Mn-O/Mn                | Mn-O/Mn                | Mn-O-Mn        | Mn-O-Mn        |        |
| 2,5       | <i>J<sub>1</sub></i>    | $\mu_4\text{-O}, \mu_3\text{-Cl}$ | 3.20276                 | 1.91238                 | 2.60212                | 1.90713                | 2.63383        | 113.969        | 75.42  |
| 3,6       | <i>J<sub>1</sub></i>    | $\mu_4\text{-O}, \mu_3\text{-Cl}$ | 3.28356                 | 1.92099                 | 2.63097                | 1.93805                | 2.61112        | 116.613        | 77.567 |
| 4,7       | <i>J<sub>1</sub></i>    | $\mu_4\text{-O}, \mu_3\text{-Cl}$ | 3.2403                  | 1.9309                  | 2.61903                | 1.91789                | 2.60808        | 114.683        | 76.618 |
| 11,15     | <i>J<sub>1</sub></i>    | $\mu_4\text{-O}, \mu_3\text{-Cl}$ | 3.23079                 | 1.91801                 | 2.6078                 | 1.91274                | 2.64356        | 114.998        | 75.934 |
| 12,16     | <i>J<sub>1</sub></i>    | $\mu_4\text{-O}, \mu_3\text{-Cl}$ | 3.21793                 | 1.9172                  | 2.61316                | 1.90983                | 2.60788        | 114.458        | 76.098 |
| 13,14     | <i>J<sub>1</sub></i>    | $\mu_4\text{-O}, \mu_3\text{-Cl}$ | 3.24247                 | 1.91501                 | 2.59568                | 1.9194                 | 2.64705        | 115.477        | 76.402 |
| 2,6       | <i>J<sub>2</sub></i>    | $\mu_4\text{-O}, \mu_3\text{-Cl}$ | 3.25845                 | 1.91238                 | 2.77367                | 1.90339                | 2.63097        | 117.286        | 74.103 |
| 3,7       | <i>J<sub>2</sub></i>    | $\mu_4\text{-O}, \mu_3\text{-Cl}$ | 3.24017                 | 1.93805                 | 2.83225                | 1.91404                | 2.60808        | 114.521        | 72.977 |
| 4,5       | <i>J<sub>2</sub></i>    | $\mu_4\text{-O}, \mu_3\text{-Cl}$ | 3.29832                 | 1.9309                  | 2.79245                | 1.91319                | 2.63383        | 118.19         | 74.803 |
| 11,14     | <i>J<sub>2</sub></i>    | $\mu_4\text{-O}, \mu_3\text{-Cl}$ | 3.27485                 | 1.91801                 | 2.845                  | 1.91366                | 2.64705        | 117.449        | 73.109 |
| 12,15     | <i>J<sub>2</sub></i>    | $\mu_4\text{-O}, \mu_3\text{-Cl}$ | 3.27532                 | 1.9161                  | 2.64356                | 1.9172                 | 2.81093        | 117.396        | 73.737 |
| 13,16     | <i>J<sub>2</sub></i>    | $\mu_4\text{-O}, \mu_3\text{-Cl}$ | 3.24344                 | 1.91501                 | 2.83282                | 1.90587                | 2.60788        | 116.178        | 73.056 |

|       |       |                                   |         |         |         |         |         |         |         |
|-------|-------|-----------------------------------|---------|---------|---------|---------|---------|---------|---------|
| 5,6   | $J_3$ | $\mu_4\text{-O}, \mu_3\text{-Cl}$ | 3.19547 | 1.90713 | 2.61858 | 1.90339 | 2.61183 | 113.983 | 75.315  |
| 6,7   | $J_3$ | $\mu_4\text{-O}, \mu_3\text{-Cl}$ | 3.19803 | 1.92099 | 2.61183 | 1.91404 | 2.6191  | 113.002 | 75.377  |
| 7,5   | $J_3$ | $\mu_4\text{-O}, \mu_3\text{-Cl}$ | 3.16284 | 1.91319 | 2.61858 | 1.91789 | 2.6191  | 111.294 | 74.294  |
| 14,15 | $J_3$ | $\mu_4\text{-O}, \mu_3\text{-Cl}$ | 3.15963 | 1.91366 | 2.59558 | 1.91274 | 2.61015 | 111.328 | 74.738  |
| 15,16 | $J_3$ | $\mu_4\text{-O}, \mu_3\text{-Cl}$ | 3.18538 | 1.9161  | 2.61015 | 1.90983 | 2.61714 | 112.729 | 75.088  |
| 16,14 | $J_3$ | $\mu_4\text{-O}, \mu_3\text{-Cl}$ | 3.17441 | 1.9194  | 2.59558 | 1.90587 | 2.61714 | 112.166 | 75.029  |
| 2,3   | $J_4$ | $\mu_4\text{-O}, \mu_3\text{-Cl}$ | 3.15781 | 1.84813 | 2.77367 | 1.84745 | 2.61112 | 117.405 | 71.736  |
| 3,4   | $J_4$ | $\mu_4\text{-O}, \mu_3\text{-Cl}$ | 3.19912 | 1.84745 | 2.83225 | 1.85301 | 2.61903 | 119.656 | 71.747  |
| 4,2   | $J_4$ | $\mu_4\text{-O}, \mu_3\text{-Cl}$ | 3.13706 | 1.84813 | 2.60212 | 1.85301 | 2.79245 | 115.901 | 71.015  |
| 11,12 | $J_4$ | $\mu_4\text{-O}, \mu_3\text{-Cl}$ | 3.2016  | 1.87301 | 2.6078  | 1.86512 | 2.81093 | 117.845 | 72.323  |
| 12,13 | $J_4$ | $\mu_4\text{-O}, \mu_3\text{-Cl}$ | 3.18167 | 1.86512 | 2.61316 | 1.86519 | 2.83282 | 117.062 | 71.367  |
| 13,11 | $J_4$ | $\mu_4\text{-O}, \mu_3\text{-Cl}$ | 3.19412 | 1.87301 | 2.845   | 1.86519 | 2.59568 | 117.399 | 71.734  |
| 1,2   | $J_5$ | $\mu_4\text{-O}, \mu_2\text{-O}$  | 3.41394 | 2.60463 | 2.15481 | 1.84813 | 1.85846 | 98.694  | 116.374 |
| 1,3   | $J_5$ | $\mu_4\text{-O}, \mu_2\text{-O}$  | 3.42062 | 2.60463 | 2.2412  | 1.84745 | 1.84153 | 98.988  | 113.462 |



|       |       |                    |         |         |         |         |         |         |         |
|-------|-------|--------------------|---------|---------|---------|---------|---------|---------|---------|
| 1,4   | $J_5$ | $\mu_4-O, \mu_2-O$ | 3.42431 | 2.60463 | 2.2121  | 1.85301 | 1.84857 | 98.989  | 114.683 |
| 1,11  | $J_5$ | $\mu_4-O, \mu_2-O$ | 3.42803 | 2.55377 | 2.24576 | 1.87301 | 1.85035 | 100.367 | 113.276 |
| 1,12  | $J_5$ | $\mu_4-O, \mu_2-O$ | 3.38762 | 2.55377 | 2.2215  | 1.86512 | 1.84268 | 98.911  | 112.594 |
| 1,13  | $J_5$ | $\mu_4-O, \mu_2-O$ | 3.38108 | 2.55377 | 2.16965 | 1.86519 | 1.85491 | 98.64   | 114.076 |
| 5,10  | $J_6$ | $\mu_4-O, \mu_2-O$ | 3.26384 | 1.90713 | 1.8918  | 2.21888 | 2.26109 | 104.311 | 103.253 |
| 6,8   | $J_6$ | $\mu_4-O, \mu_2-O$ | 3.2256  | 1.92099 | 1.90214 | 2.13986 | 2.37963 | 105.054 | 97.131  |
| 7,9   | $J_6$ | $\mu_4-O, \mu_2-O$ | 3.27035 | 1.91789 | 1.8944  | 2.17476 | 2.28253 | 105.914 | 102.668 |
| 14,18 | $J_6$ | $\mu_4-O, \mu_2-O$ | 3.2584  | 1.9194  | 1.89378 | 2.19385 | 2.27    | 104.581 | 102.616 |
| 15,19 | $J_6$ | $\mu_4-O, \mu_2-O$ | 3.2735  | 1.91274 | 1.88524 | 2.21559 | 2.29602 | 104.683 | 102.61  |
| 16,17 | $J_6$ | $\mu_4-O, \mu_2-O$ | 3.2316  | 1.90983 | 1.89374 | 2.18678 | 2.26796 | 103.951 | 101.505 |
| 2,10  | $J_7$ | $\mu_4-O, \mu_2-O$ | 3.27927 | 1.91238 | 1.90348 | 2.21888 | 2.30001 | 104.835 | 102.133 |
| 3,8   | $J_7$ | $\mu_4-O, \mu_2-O$ | 3.1949  | 1.93805 | 1.88599 | 2.13986 | 2.24067 | 103.046 | 101.118 |
| 4,9   | $J_7$ | $\mu_4-O, \mu_2-O$ | 3.24949 | 1.9309  | 1.89914 | 2.17476 | 2.38466 | 104.489 | 98.034  |
| 11,19 | $J_7$ | $\mu_4-O, \mu_2-O$ | 3.28306 | 1.91801 | 1.90674 | 2.21559 | 2.3663  | 104.938 | 99.848  |

|       |       |                                  |         |         |         |         |         |         |         |
|-------|-------|----------------------------------|---------|---------|---------|---------|---------|---------|---------|
| 12,17 | $J_7$ | $\mu_4\text{-O}, \mu_2\text{-O}$ | 3.25284 | 1.9172  | 1.90494 | 2.18678 | 2.34231 | 104.668 | 99.454  |
| 13,18 | $J_7$ | $\mu_4\text{-O}, \mu_2\text{-O}$ | 3.28025 | 1.91501 | 1.90512 | 2.19385 | 2.39482 | 105.743 | 98.796  |
| 6,10  | $J_8$ | $\mu_4\text{-O}, \mu_2\text{-O}$ | 3.16238 | 1.90339 | 1.88503 | 2.21888 | 2.11266 | 99.914  | 104.424 |
| 5,9   | $J_8$ | $\mu_4\text{-O}, \mu_2\text{-O}$ | 3.13788 | 1.91319 | 1.88653 | 2.17476 | 2.12928 | 100.08  | 102.607 |
| 7,8   | $J_8$ | $\mu_4\text{-O}, \mu_2\text{-O}$ | 3.16269 | 1.91404 | 1.89424 | 2.13986 | 2.1772  | 102.408 | 101.712 |
| 14,19 | $J_8$ | $\mu_4\text{-O}, \mu_2\text{-O}$ | 3.19949 | 1.91366 | 1.88902 | 2.21559 | 2.15048 | 101.329 | 104.57  |
| 15,17 | $J_8$ | $\mu_4\text{-O}, \mu_2\text{-O}$ | 3.17718 | 1.9161  | 1.89086 | 2.18678 | 2.13694 | 101.293 | 103.982 |
| 16,18 | $J_8$ | $\mu_4\text{-O}, \mu_2\text{-O}$ | 3.15791 | 1.90587 | 1.89353 | 2.19385 | 2.11403 | 100.522 | 103.86  |

**Table S5:** Selected structural parameter along with the exchange coupling constant of the reduced geometry of **1** on Au(111) surface. Mn atom numbers as per Figure 1b in the main manuscript.

| <i>Mn</i> | <i>bridging ligands</i>                                     | <i>M ··· M (Å)</i> | <i>Mn<sup>III</sup></i> |         | <i>Mn<sup>II</sup></i> |         | <i>Mn<sup>II</sup></i> |         | <i>Mn<sup>II</sup></i> |  |
|-----------|-------------------------------------------------------------|--------------------|-------------------------|---------|------------------------|---------|------------------------|---------|------------------------|--|
|           |                                                             |                    | Mn-O/Mn                 | Mn-O/Mn | Mn-O/Mn                | Mn-O/Mn | Mn-O-Mn                | Mn-O-Mn |                        |  |
| 2,5       | <i>J</i> <sub>1</sub> μ <sub>4</sub> -O, μ <sub>3</sub> -Cl | 3.33299            | 1.99345                 | 2.50476 | 2.00548                | 3.05535 | 112.913                | 72.901  |                        |  |
| 3,6       | <i>J</i> <sub>1</sub> μ <sub>4</sub> -O, μ <sub>3</sub> -Cl | 3.23098            | 2.04809                 | 2.55796 | 1.91121                | 2.66018 | 109.333                | 76.485  |                        |  |
| 4,7       | <i>J</i> <sub>1</sub> μ <sub>4</sub> -O, μ <sub>3</sub> -Cl | 3.29033            | 2.00063                 | 2.49093 | 2.11505                | 2.7959  | 106.124                | 76.737  |                        |  |
| 11,15     | <i>J</i> <sub>1</sub> μ <sub>4</sub> -O, μ <sub>3</sub> -Cl | 3.22887            | 2.08722                 | 2.55786 | 2.02467                | 2.5223  | 103.477                | 78.923  |                        |  |
| 12,16     | <i>J</i> <sub>1</sub> μ <sub>4</sub> -O, μ <sub>3</sub> -Cl | 3.22061            | 2.02721                 | 2.44135 | 1.97004                | 3.07368 | 107.348                | 70.396  |                        |  |
| 13,14     | <i>J</i> <sub>1</sub> μ <sub>4</sub> -O, μ <sub>3</sub> -Cl | 3.19146            | 2.04314                 | 2.5349  | 1.98328                | 2.72529 | 104.854                | 74.607  |                        |  |
| 2,6       | <i>J</i> <sub>2</sub> μ <sub>4</sub> -O, μ <sub>3</sub> -Cl | 3.31077            | 1.99345                 | 2.87149 | 1.87206                | 2.66018 | 117.815                | 73.415  |                        |  |
| 3,7       | <i>J</i> <sub>2</sub> μ <sub>4</sub> -O, μ <sub>3</sub> -Cl | 3.40901            | 2.04809                 | 2.67609 | 2.0158                 | 2.7959  | 114.036                | 77.036  |                        |  |
| 4,5       | <i>J</i> <sub>2</sub> μ <sub>4</sub> -O, μ <sub>3</sub> -Cl | 3.54005            | 2.00063                 | 3.11558 | 1.974                  | 3.05535 | 125.912                | 70.005  |                        |  |
| 11,14     | <i>J</i> <sub>2</sub> μ <sub>4</sub> -O, μ <sub>3</sub> -Cl | 3.31246            | 2.08722                 | 2.63083 | 1.92842                | 2.72529 | 111.093                | 76.383  |                        |  |
| 12,15     | <i>J</i> <sub>2</sub> μ <sub>4</sub> -O, μ <sub>3</sub> -Cl | 3.27884            | 2.02721                 | 2.93563 | 1.9972                 | 2.5223  | 109.12                 | 73.407  |                        |  |
| 13,16     | <i>J</i> <sub>2</sub> μ <sub>4</sub> -O, μ <sub>3</sub> -Cl | 3.55229            | 2.04314                 | 2.76361 | 1.94108                | 3.07368 | 126.128                | 74.758  |                        |  |

|       |       |                                   |         |         |         |         |         |         |        |
|-------|-------|-----------------------------------|---------|---------|---------|---------|---------|---------|--------|
| 5,6   | $J_3$ | $\mu_4\text{-O}, \mu_3\text{-Cl}$ | 3.23527 | 2.00548 | 2.50543 | 1.87206 | 3.03991 | 113.054 | 70.634 |
| 6,7   | $J_3$ | $\mu_4\text{-O}, \mu_3\text{-Cl}$ | 3.3353  | 1.91121 | 3.03991 | 2.0158  | 2.50143 | 116.251 | 73.285 |
| 7,5   | $J_3$ | $\mu_4\text{-O}, \mu_3\text{-Cl}$ | 3.05576 | 1.974   | 2.50543 | 2.50543 | 2.50143 | 96.654  | 75.224 |
| 14,15 | $J_3$ | $\mu_4\text{-O}, \mu_3\text{-Cl}$ | 3.18746 | 1.92842 | 2.98544 | 2.02467 | 2.68384 | 107.451 | 68.181 |
| 15,16 | $J_3$ | $\mu_4\text{-O}, \mu_3\text{-Cl}$ | 3.23503 | 1.9972  | 2.68384 | 1.97004 | 2.67361 | 109.259 | 74.29  |
| 16,14 | $J_3$ | $\mu_4\text{-O}, \mu_3\text{-Cl}$ | 3.26585 | 1.98328 | 2.98544 | 1.94108 | 2.67361 | 112.646 | 70.247 |
| 2,3   | $J_4$ | $\mu_4\text{-O}, \mu_3\text{-Cl}$ | 3.23549 | 2.09593 | 2.87149 | 2.07585 | 2.07585 | 101.712 | 72.897 |
| 3,4   | $J_4$ | $\mu_4\text{-O}, \mu_3\text{-Cl}$ | 3.18288 | 2.07585 | 2.67609 | 2.05253 | 2.49093 | 100.882 | 75.955 |
| 4,2   | $J_4$ | $\mu_4\text{-O}, \mu_3\text{-Cl}$ | 3.40505 | 2.09593 | 2.50476 | 2.05253 | 3.11558 | 110.326 | 73.678 |
| 11,12 | $J_4$ | $\mu_4\text{-O}, \mu_3\text{-Cl}$ | 3.39712 | 2.09083 | 2.55786 | 2.02177 | 2.93563 | 111.375 | 76.051 |
| 12,13 | $J_4$ | $\mu_4\text{-O}, \mu_3\text{-Cl}$ | 3.17269 | 2.02177 | 2.44135 | 2.08973 | 2.76361 | 100.994 | 74.827 |
| 13,11 | $J_4$ | $\mu_4\text{-O}, \mu_3\text{-Cl}$ | 3.31213 | 2.09083 | 2.63083 | 2.08973 | 2.5349  | 104.796 | 79.735 |
| 1,2   | $J_5$ | $\mu_4\text{-O}, \mu_2\text{-O}$  | 3.19921 | 1.92893 | 2.10447 | 2.09593 | 2.45852 | 105.209 | 88.681 |
| 1,3   | $J_5$ | $\mu_4\text{-O}, \mu_2\text{-O}$  | 3.50518 | 1.92893 | 2.98944 | 2.07585 | 2.29415 | 122.106 | 81.98  |

|       |       |                    |         |         |         |         |         |         |         |
|-------|-------|--------------------|---------|---------|---------|---------|---------|---------|---------|
| 1,4   | $J_5$ | $\mu_4-O, \mu_2-O$ | 3.37034 | 1.92893 | 2.74071 | 2.05253 | 2.4716  | 115.633 | 80.393  |
| 1,11  | $J_5$ | $\mu_4-O, \mu_2-O$ | 3.42664 | 1.9253  | 2.92898 | 2.09083 | 2.41181 | 117.068 | 79.173  |
| 1,12  | $J_5$ | $\mu_4-O, \mu_2-O$ | 3.13253 | 1.9253  | 2.28831 | 2.02177 | 3.23155 | 105.027 | 66.63   |
| 1,13  | $J_5$ | $\mu_4-O, \mu_2-O$ | 3.41526 | 1.9253  | 2.9128  | 2.08973 | 2.44592 | 116.499 | 78.655  |
| 5,10  | $J_6$ | $\mu_4-O, \mu_2-O$ | 3.26125 | 2.00548 | 2.02864 | 2.22246 | 2.12846 | 100.827 | 103.323 |
| 6,8   | $J_6$ | $\mu_4-O, \mu_2-O$ | 3.16554 | 1.91121 | 1.92777 | 2.08206 | 2.31464 | 104.8   | 96.09   |
| 7,9   | $J_6$ | $\mu_4-O, \mu_2-O$ | 3.17831 | 2.11505 | 2.04881 | 2.01896 | 2.10589 | 100.47  | 99.803  |
| 14,18 | $J_6$ | $\mu_4-O, \mu_2-O$ | 3.17273 | 1.98328 | 2.0055  | 2.14291 | 2.26734 | 100.443 | 95.701  |
| 15,19 | $J_6$ | $\mu_4-O, \mu_2-O$ | 3.05598 | 2.02467 | 2.01624 | 2.01511 | 2.19275 | 98.308  | 93.019  |
| 16,17 | $J_6$ | $\mu_4-O, \mu_2-O$ | 3.12008 | 1.97004 | 1.97889 | 2.07014 | 2.14014 | 101.086 | 98.409  |
| 2,10  | $J_7$ | $\mu_4-O, \mu_2-O$ | 3.46127 | 1.99345 | 3.73582 | 2.22246 | 2.15597 | 110.253 | 65.719  |
| 3,8   | $J_7$ | $\mu_4-O, \mu_2-O$ | 3.17436 | 2.04809 | 2.06611 | 2.08206 | 2.1103  | 100.45  | 98.935  |
| 4,9   | $J_7$ | $\mu_4-O, \mu_2-O$ | 3.31214 | 2.00063 | 2.01839 | 2.01896 | 2.7273  | 110.973 | 87.179  |
| 11,19 | $J_7$ | $\mu_4-O, \mu_2-O$ | 3.52077 | 2.08722 | 2.02163 | 2.01511 | 2.8832  | 118.228 | 89.98   |

|       |       |                                  |         |         |         |         |         |         |         |
|-------|-------|----------------------------------|---------|---------|---------|---------|---------|---------|---------|
| 12,17 | $J_7$ | $\mu_4\text{-O}, \mu_2\text{-O}$ | 3.46105 | 2.02721 | 1.95586 | 2.07014 | 2.97882 | 115.277 | 86.458  |
| 13,18 | $J_7$ | $\mu_4\text{-O}, \mu_2\text{-O}$ | 3.48325 | 2.04314 | 1.99628 | 2.14291 | 2.91545 | 112.61  | 88.267  |
| 6,10  | $J_8$ | $\mu_4\text{-O}, \mu_2\text{-O}$ | 3.13641 | 1.87206 | 1.92777 | 2.08206 | 2.31464 | 104.8   | 96.09   |
| 5,9   | $J_8$ | $\mu_4\text{-O}, \mu_2\text{-O}$ | 3.31164 | 1.974   | 2.26545 | 2.01896 | 2.57674 | 112.063 | 86.047  |
| 7,8   | $J_8$ | $\mu_4\text{-O}, \mu_2\text{-O}$ | 3.36554 | 2.0158  | 2.29656 | 2.08206 | 2.86856 | 110.418 | 80.494  |
| 14,19 | $J_8$ | $\mu_4\text{-O}, \mu_2\text{-O}$ | 3.34372 | 1.92842 | 2.83049 | 2.01511 | 2.32754 | 115.951 | 80.174  |
| 15,17 | $J_8$ | $\mu_4\text{-O}, \mu_2\text{-O}$ | 3.41412 | 1.9972  | 2.91283 | 2.07014 | 2.19388 | 114.141 | 82.621  |
| 16,18 | $J_8$ | $\mu_4\text{-O}, \mu_2\text{-O}$ | 3.06908 | 1.94108 | 1.93837 | 2.14291 | 2.05222 | 97.316  | 100.504 |

**Table S6:** Computed spin densities of various spin states of the 1 (X-ray structure).

| Mn (ion)<br>X-ray | HS   | BS1   | BS2   | BS3   | BS4   | BS5   | BS6   | BS7   | BS8   |
|-------------------|------|-------|-------|-------|-------|-------|-------|-------|-------|
| Mn1               | 4.78 | 4.76  | 4.77  | 4.72  | 4.78  | -4.77 | 4.86  | 4.77  | -4.74 |
| Mn2               | 3.85 | 3.83  | 3.82  | -3.76 | 3.83  | -3.82 | 3.83  | -3.72 | 3.76  |
| Mn3               | 3.82 | 3.79  | 3.79  | -3.73 | 3.80  | -3.77 | 3.82  | 3.79  | -3.75 |
| Mn4               | 3.84 | -3.73 | -3.71 | -3.75 | 3.82  | -3.80 | -3.74 | 3.79  | 3.76  |
| Mn5               | 3.90 | -3.77 | 3.84  | 3.86  | -3.78 | 3.86  | 3.84  | 3.82  | -3.75 |
| Mn6               | 3.89 | 3.88  | 3.85  | 3.86  | -3.79 | 3.86  | 3.86  | 3.86  | 3.83  |
| Mn7               | 3.88 | 3.86  | 3.87  | 3.85  | -3.78 | 3.85  | 3.85  | -3.77 | 3.80  |
| Mn8               | 4.82 | 4.81  | 4.82  | 4.81  | 4.80  | 4.81  | 4.85  | 4.82  | -4.80 |
| Mn9               | 4.83 | 4.81  | 4.82  | 4.82  | 4.81  | 4.82  | 4.84  | -4.81 | 4.82  |
| Mn10              | 4.82 | 4.81  | -4.80 | 4.81  | 4.81  | 4.81  | 4.85  | 4.81  | 4.81  |
| Mn11              | 3.85 | 3.81  | 3.82  | -3.76 | 3.83  | -3.81 | 3.83  | -3.73 | 3.77  |
| Mn12              | 3.84 | 3.82  | 3.83  | -3.75 | 3.82  | -3.80 | 3.83  | 3.80  | -3.79 |
| Mn13              | 3.85 | -3.72 | 3.84  | -3.76 | 3.83  | -3.81 | -3.74 | 3.82  | 3.87  |
| Mn14              | 3.89 | -3.76 | -3.78 | 3.85  | -3.77 | 3.85  | 3.85  | 3.81  | 3.87  |
| Mn15              | 3.89 | 3.88  | 3.85  | 3.85  | -3.77 | 3.85  | 3.86  | 3.82  | -3.81 |
| Mn16              | 3.89 | 3.86  | 3.87  | 3.85  | -3.77 | 3.85  | 3.84  | -3.75 | 3.83  |
| Mn17              | 4.82 | 4.81  | 4.81  | 4.81  | 4.80  | 4.81  | 4.85  | 4.81  | -4.81 |
| Mn18              | 4.82 | 4.81  | 4.81  | 4.81  | 4.80  | 4.81  | 4.84  | 4.82  | 4.81  |
| Mn19              | 4.82 | 4.82  | -4.81 | 4.82  | 4.81  | 4.82  | 4.85  | -4.81 | 4.82  |

**Table S7:** Computed spin densities of various spin states of the 1 on Au(111) surface, end-on orientation.

| Mn (ion)<br>end-on | HS   | BS1   | BS2   | BS3   | BS4   | BS5   | BS6   | BS7   | BS8   |
|--------------------|------|-------|-------|-------|-------|-------|-------|-------|-------|
| Mn1                | 4.80 | 4.79  | 4.79  | 4.75  | 4.79  | -4.79 | 4.79  | 4.79  | -4.77 |
| Mn2                | 3.85 | 3.83  | 3.81  | -3.76 | 3.83  | -3.81 | 3.83  | -3.72 | 3.77  |
| Mn3                | 3.82 | 3.79  | 3.79  | -3.73 | 3.79  | -3.77 | 3.79  | 3.78  | -3.75 |
| Mn4                | 3.84 | -3.73 | -3.71 | -3.75 | 3.82  | -3.80 | -3.71 | 3.79  | 3.76  |
| Mn5                | 3.89 | -3.76 | 3.83  | 3.85  | -3.77 | 3.85  | 3.87  | 3.82  | -3.74 |
| Mn6                | 3.88 | 3.86  | 3.85  | 3.85  | -3.78 | 3.85  | 3.88  | 3.85  | 3.82  |
| Mn7                | 3.88 | 3.85  | 3.86  | 3.84  | -3.77 | 3.84  | 3.87  | -3.77 | 3.80  |
| Mn8                | 4.82 | 4.82  | 4.82  | 4.82  | 4.81  | 4.82  | 4.82  | 4.82  | -4.81 |
| Mn9                | 4.83 | 4.81  | 4.82  | 4.82  | 4.81  | 4.82  | 4.82  | -4.81 | 4.82  |
| Mn10               | 4.83 | 4.83  | -4.80 | 4.82  | 4.81  | 4.82  | 4.83  | 4.82  | 4.82  |
| Mn11               | 3.85 | 3.81  | 3.82  | -3.76 | 3.83  | -3.81 | 3.82  | -3.74 | 3.78  |
| Mn12               | 3.83 | 3.81  | 3.83  | -3.75 | 3.81  | -3.79 | 3.81  | 3.80  | -3.78 |
| Mn13               | 3.84 | -3.72 | 3.83  | -3.75 | 3.82  | -3.80 | -3.71 | 3.81  | 3.77  |
| Mn14               | 3.87 | -3.75 | -3.76 | 3.83  | -3.76 | 3.83  | 3.86  | 3.80  | 3.85  |
| Mn15               | 3.87 | 3.85  | 3.83  | 3.83  | -3.76 | 3.83  | 3.87  | 3.80  | -3.79 |
| Mn16               | 3.87 | 3.83  | 3.85  | 3.83  | -3.76 | 3.83  | 3.85  | -3.72 | 3.81  |
| Mn17               | 4.84 | 4.83  | 4.83  | 4.82  | 4.82  | 4.83  | 4.84  | 4.83  | -4.83 |
| Mn18               | 4.83 | 4.82  | 4.82  | 4.82  | 4.81  | 4.82  | 4.82  | 4.82  | 4.82  |
| Mn19               | 4.83 | 4.82  | -4.81 | 4.83  | 4.81  | 4.83  | 4.83  | -4.81 | 4.83  |



**Table S8:** Computed spin densities of various spin states of the 1 on Au(111) surface, side-on orientation.

| Mn (ion)<br>side-on | HS   | BS1   | BS2   | BS3   | BS4   | BS5   | BS6   | BS7   | BS8   |
|---------------------|------|-------|-------|-------|-------|-------|-------|-------|-------|
| Mn1                 | 4.77 | 4.74  | 4.76  | 4.70  | 4.76  | -4.76 | 4.73  | 4.74  | -4.73 |
| Mn2                 | 3.86 | 3.83  | 3.81  | -3.76 | 3.83  | -3.81 | 3.83  | -3.71 | 3.77  |
| Mn3                 | 3.84 | 3.81  | 3.81  | -3.75 | 3.82  | -3.79 | 3.81  | 3.81  | -3.77 |
| Mn4                 | 3.85 | -3.73 | -3.72 | -3.76 | 3.83  | -3.81 | -3.72 | 3.80  | 3.77  |
| Mn5                 | 3.88 | -3.76 | 3.82  | 3.85  | -3.77 | 3.84  | 3.86  | 3.82  | -3.75 |
| Mn6                 | 3.89 | 3.86  | 3.84  | 3.85  | -3.78 | 3.85  | 3.89  | 3.85  | 3.82  |
| Mn7                 | 3.88 | 3.86  | 3.87  | 3.85  | -3.77 | 3.85  | 3.87  | -3.79 | 3.82  |
| Mn8                 | 4.83 | 4.83  | 4.83  | 4.83  | 4.82  | 4.83  | 4.83  | 4.82  | -4.82 |
| Mn9                 | 4.83 | 4.82  | 4.83  | 4.83  | 4.81  | 4.83  | 4.83  | -4.81 | 4.82  |
| Mn10                | 4.82 | 4.82  | -4.80 | 4.81  | 4.81  | 4.81  | 4.82  | 4.81  | 4.81  |
| Mn11                | 3.86 | 3.82  | 3.83  | -3.77 | 3.84  | -3.82 | 3.84  | -3.75 | 3.79  |
| Mn12                | 3.85 | 3.83  | 3.85  | -3.76 | 3.83  | -3.81 | 3.83  | 3.82  | -3.80 |
| Mn13                | 3.86 | -3.73 | 3.85  | -3.76 | 3.84  | -3.81 | -3.72 | 3.83  | 3.79  |
| Mn14                | 3.89 | -3.76 | -3.79 | 3.85  | -3.77 | 3.85  | 3.87  | 3.82  | 3.86  |
| Mn15                | 3.88 | 3.87  | 3.84  | 3.85  | -3.77 | 3.85  | 3.88  | 3.81  | -3.81 |
| Mn16                | 3.88 | 3.84  | 3.86  | 3.84  | -3.77 | 3.84  | 3.86  | -3.75 | 3.82  |
| Mn17                | 4.83 | 4.83  | 4.83  | 4.83  | 4.82  | 4.83  | 4.83  | 4.83  | -4.82 |
| Mn18                | 4.83 | 4.82  | 4.83  | 4.82  | 4.81  | 4.82  | 4.83  | 4.82  | 4.83  |
| Mn19                | 4.84 | 4.83  | -4.82 | 4.83  | 4.82  | 4.83  | 4.84  | -4.82 | 4.83  |

### Bond Length and Bond Angle Parameters

Selected bond angles and bond lengths of **1** of the optimized structure (bare) as well as with Au(111) surface are given in the following table. Also all the parameters have been shown against the X-ray structure parameters<sup>6</sup>. The Au-S bond lengths have been found to be in the range of 2.72 – 3.87 Å.

**Table S9:** Bond length and bond angle parameters of **1**.

| A                                                   | Experimental(Å) | Optimized | End-on | Side-on | Mn19_red |
|-----------------------------------------------------|-----------------|-----------|--------|---------|----------|
| O <sup>a</sup> -Mn <sup>II</sup>                    | 2.31            | 2.25      | 2.21   | 2.21    | 2.13     |
| Mn <sup>II</sup> -O <sup>a</sup> -Mn <sup>III</sup> | 101.7           | 101.5     | 97.2   | 97.2    | 96.1     |
| O <sup>a</sup> -Mn <sup>III</sup>                   | 1.9             | 1.88      | 1.88   | 1.88    | 2.02     |
| O <sup>b</sup> -Mn <sup>III</sup>                   | 1.85            | 1.82      | 1.83   | 1.83    | 2.02     |
| Mn <sup>III</sup> -O <sup>b</sup> -Mn <sup>II</sup> | 111.2           | 109.7     | 108.5  | 108.5   | 88.7     |
| O <sup>b</sup> -Mn <sup>II</sup>                    | 2.30            | 2.22      | 2.21   | 2.21    | 2.10     |
| O <sup>c</sup> -Mn <sup>II</sup>                    | 2.21            | 2.23      | 2.24   | 2.24    | 2.29     |
| B                                                   |                 |           |        |         |          |
| O <sup>a</sup> -Mn <sup>II</sup>                    | 2.33            | 2.24      | 2.21   | 2.26    | 2.21     |
| Mn <sup>II</sup> -O <sup>a</sup> -Mn <sup>III</sup> | 102.1           | 100.7     | 102.4  | 101.7   | 99.8     |
| O <sup>a</sup> -Mn <sup>III</sup>                   | 1.90            | 1.91      | 1.91   | 1.91    | 2.05     |
| O <sup>b</sup> -Mn <sup>III</sup>                   | 1.87            | 1.88      | 1.88   | 1.89    | 1.89     |
| Mn <sup>III</sup> -O <sup>b</sup> -Mn <sup>II</sup> | 104.7           | 103.7     | 106.7  | 104.7   | 104.7    |
| O <sup>b</sup> -Mn <sup>II</sup>                    | 2.21            | 2.10      | 2.08   | 2.12    | 2.06     |
| O <sup>c</sup> -Mn <sup>II</sup>                    | 2.21            | 2.18      | 2.22   | 2.2     | 2.17     |

**Table S10:** Table showing Au-S bond lengths in Å of **1** on Au(111) after optimization using PBE functional.

| Au-S End-on | Bond length (Å) | Au-S Side-on | Bond length (Å) |
|-------------|-----------------|--------------|-----------------|
| Au2-S575    | 3.12            | Au34-S657    | 2.73            |
| Au6-S575    | 3.10            | Au207-S657   | 3.73            |
| Au253-S575  | 3.12            | Au35-S657    | 3.71            |
| Au4-S521    | 3.43            | Au282-S547   | 2.73            |
| Au7-S521    | 2.91            | Au281-S547   | 3.06            |
| Au78-S521   | 2.86            | Au284-S547   | 3.14            |
| Au11-S629   | 3.08            | Au71-S770    | 2.72            |
| Au12-S629   | 3.17            | Au25-S770    | 3.76            |
| Au182-S629  | 2.84            | Au99-S770    | 3.87            |

### Adsorption energies:

The Adsorption of **1** on gold surface has been modeled by a three layer of Au(111) with 324 and 432 gold atoms. Table S8 lists the activation energy of S-CH<sub>3</sub> cleavage and reaction energy of the adsorption of **1** on gold surface obtained using theoretical approach as mentioned previously. The adsorption energies,  $\Delta E$  and  $\Delta E'$  were computed using the following equations unless otherwise mentioned,

$$\Delta E = [E\{Mn_{19}SMe(Au111)\}] - E\{Au(111) + Mn_{19}SMe\}] \quad I$$

$$\Delta E' = [E\{Mn_{19}S^*(Au111) + 3CH_3^*\}] - E\{Au(111) + Mn_{19}SMe\}] \quad II$$

Equation I and II give the energy changes of adsorption of Mn<sub>19</sub>SMe on Au(111) surface. Where  $E\{Mn_{19}SMe(Au111)\}$  is the total energy of Mn<sub>19</sub>SMe when adsorbed on Au(111) surface,  $E\{Au(111) + Mn_{19}SMe\}$  is the sum of the energies of Au(111) surface and Mn<sub>19</sub>SMe optimized structure respectively and  $E\{Mn_{19}S^*\}$  is the energy of radical state of Mn19.

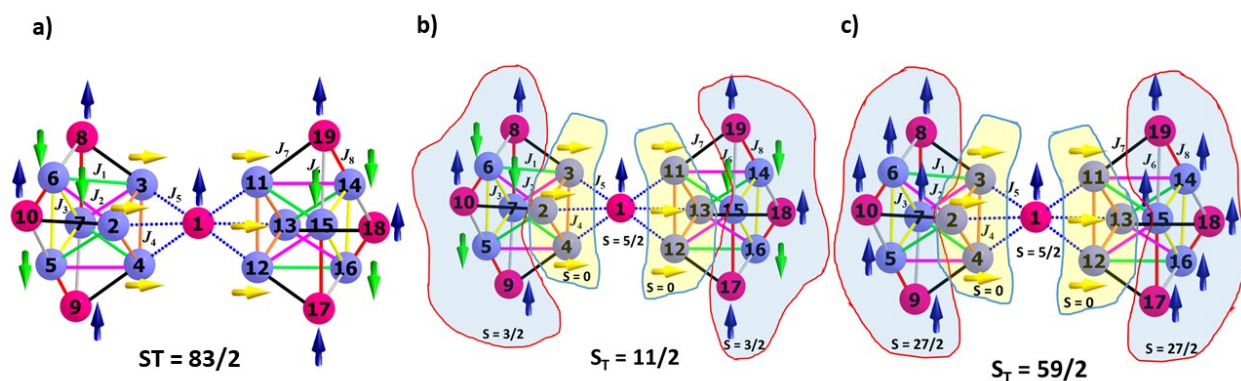

**Figure S5:** Ground state of **1** on a) pristine X-ray structure. b) for end-on orientation and c) side-on orientations of **1** on Au(111)

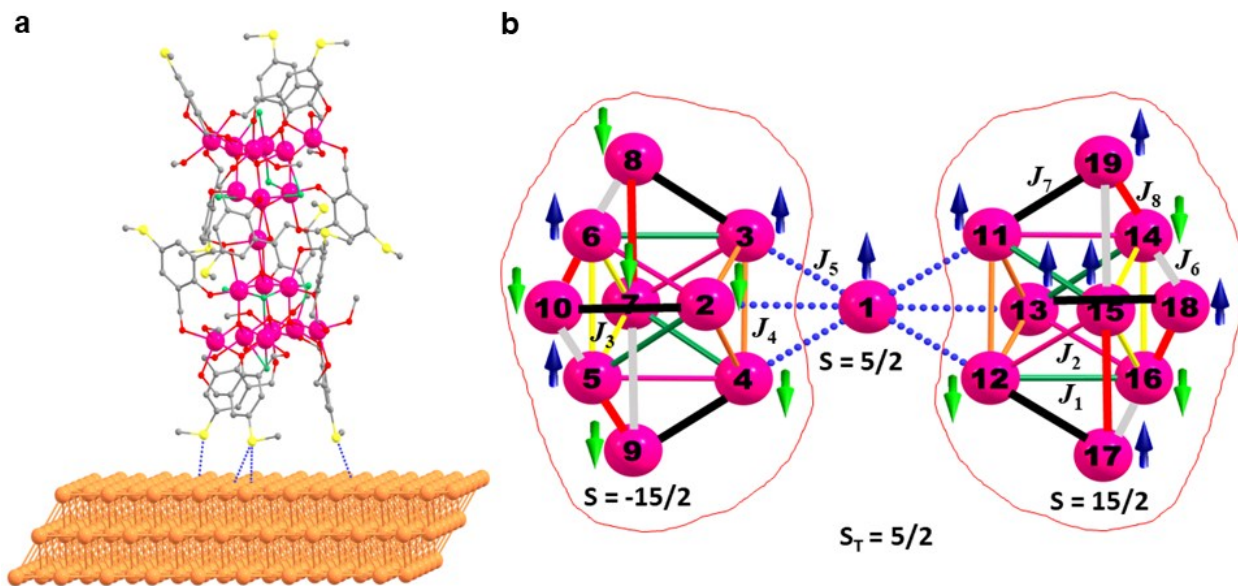

**Figure S6:** a) Reduced structure of **1** on Au(111) b) Ground state of **1** after reduction.

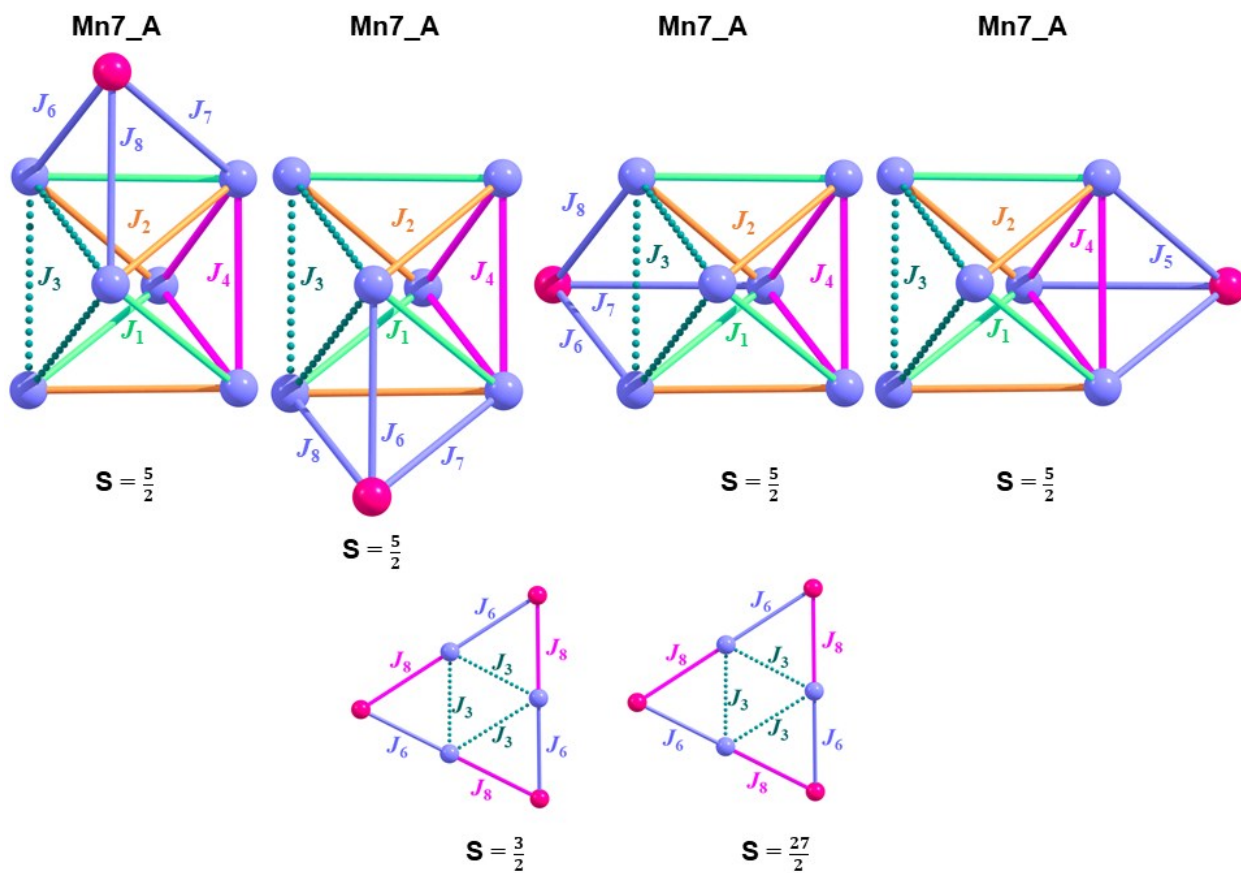

**Figure S7.** Various small model system constructed based on the exchange topology depicted and three set of computed exchange coupling constants to arrive at the possible ground state spin configuration of **1**.

**References:**

1. J. VandeVondele, M. Krack, F. Mohamed, M. Parrinello, T. Chassaing and J. Hutter, *Comput. Phys. Commun.*, 2005, **167**, 103-128.
2. J. Paier, R. Hirschl, M. Marsman and G. Kresse, *J. Chem. Phys.*, 2005, **122**, 234102.
3. G. Lippert, J. Hutter and M. Parrinello, *Theor. Chem. Acc.*, 1999, **103**, 124-140.
4. B. G. Lippert, J. H. Parrinello and Michele, *Mol. Phys.*, 1997, **92**, 477-488.
5. E. Ruiz, T. Cauchy, J. Cano, R. Costa, J. Tercero and S. Alvarez, *J. Am. Chem. Soc.*, 2008, **130**, 7420-7426.
